# Supplementary material
Source: publisher figshare collection journal article supplement (https://acs.figshare.com/ndownloader/files/14940698)
Supplement: Supplementary file 1 [file 14940698]

# Perovskite Solar Cells based on Oligotriarylamine Hexaarylbenzene as Hole Transporting Materials.

Mona Shasti,<sup>§,†</sup> Sebastian F. Völker,<sup>‡</sup> Silvia Collavini,<sup>‡</sup> Silvia Valero,<sup>‡</sup> Fernando Ruipérez,<sup>‡</sup> Abdollah Mortezaali,<sup>†</sup> Shaik. M. Zakeeruddin,<sup>||</sup> M. Grätzel,<sup>\*||</sup> A. Hagfeldt,<sup>\* §</sup> and Juan Luis Delgado<sup>\* ‡, #</sup>

## *SUPPORTING INFORMATION*

§ M. Shasti, Prof. A. Hagfeldt.

Laboratory for Photonics and Interfaces, Institute of Chemical Sciences and Engineering, École Polytechnique Fédérale de Lausanne, CH-1015-Lausanne, Switzerland

E-mail: [anders.hagfeldt@epfl.ch](mailto:anders.hagfeldt@epfl.ch)

‡ Dr. S. F Völker, S. Collavini, S. Valero, Dr. F. Ruipérez, Prof. J. L. Delgado.

POLYMAT, University of the Basque Country UPV/EHU  
Avenida de Tolosa 72, 20018 Donostia–San Sebastián, Spain.

E-mail: [juanluis.delgado@polymat.eu](mailto:juanluis.delgado@polymat.eu)

† M. Shasti, Prof. A. Mortezaali.

Department of Physics, Alzahra University, 1993893973, Iran.

|| Dr. S. M. Zakeeruddin, Prof. M. Grätzel.

Laboratory for Photonics and Interfaces, Institute of Chemical Sciences and Engineering, École Polytechnique Fédérale de Lausanne, CH-1015-Lausanne, Switzerland.

E-mail: [michael.graetzel@epfl.ch](mailto:michael.graetzel@epfl.ch)

# Prof. Juan Luis Delgado.

Ikerbasque, Basque Foundation for Science, 48013 Bilbao, Spain.

●The authors contributed equally to this work.

## **Contents**

- 1. Experimental Methods**
- 2. Synthetic procedures**
- 3. Supporting Characterization Figures**
- 4. Perovskite Solar Cells Preparation**
- 5. PSCs Characterization**

## 1. Experimental Methods

### Synthesis and materials.

Chemicals were purchased from commercial suppliers and used without further purification. Reactions under nitrogen or argon atmosphere were performed in flame-dried glassware with dry solvents. For flash chromatography, silica gel (40–60  $\mu\text{m}$ ) from Acros was used.

### Material characterization.

NMR spectra were recorded on either a Bruker Avance 300 ( $^1\text{H}$ : 300.2 MHz,  $^{13}\text{C}$ : 75.5 MHz) or 500 ( $^1\text{H}$ : 500.1 MHz,  $^{13}\text{C}$ : 125.8 MHz) at room temperature. The chemical shift ( $\delta$ ) is quoted in ppm relative to the internal standard tetramethylsilane (TMS). The coupling constant  $J$  is given in Hertz (Hz). Proton spin multiplicities and C-atom depictions are: s = singlet, d = doublet, t = triplet, q = quartet, m = multiplet; prim = primary, sec = secondary, tert = tertiary, quart = quaternary.

Mass spectra were recorded on either a Bruker-AUTOFLEX SPEED in San Sebastián or on a Bruker-ULTRAFLEX III (MALDI-TOF) in the facilities of the Universidad Autónoma de Madrid.

UV-Vis spectra were recorded with a PerkinElmer Lambda 950 UV/Vis/NIR spectrometer. Experiments were carried out in 1 cm quartz cuvettes and neat solvent was used as reference.

Fluorescence and excitation spectra were recorded with a PerkinElmer LS 55 fluorescence spectrometer. Experiments were carried out in 1 cm quartz cuvettes.

Electrochemical experiments were performed with a Princeton Applied Research Parstat 2273 in a custom made glass cell using a three electrode setup with a platinum working electrode ( $\varnothing = 0.5$  mm), a platinum wire counter electrode ( $\varnothing = 0.5$  mm), and a Ag/AgNO<sub>3</sub> wire pseudoreference electrode in DCM with tetrabutylammonium hexafluorophosphate (TBAHFP) as supporting electrolyte ( $c = 0.1$ – $0.2$  M). Cyclic voltammograms were recorded at a scan rate of 250 mV s<sup>-1</sup>, and referenced vs the ferrocene/ferrocenium (Fc/Fc<sup>+</sup>) redox couple. HOMO energy levels were obtained from the half-wave potentials of the cyclic voltammetry measurements. The potential of Fc/Fc<sup>+</sup> in TBAHFP/DCM is 0.46 eV vs the saturated calomel electrode SCE,<sup>[1]</sup> whose potential is 0.244 V vs the normal hydrogen electrode (NHE).<sup>[2]</sup> This has an absolute potential of 4.46 eV vs vacuum, which leads to the applied equation:  $E(\text{HOMO/LUMO}) = -5.16 \text{ eV} - E(\text{oxidation})$ .<sup>[3]</sup>

### Photovoltaic Study Materials.

Complete synthetic procedure can be found in the SI. Synthetic procedures were performed in standard glassware and reagents from commercial suppliers were used without further purification. Reactions under inert atmosphere were performed in flame-dried glass ware in dry solvents. Flash chromatography was performed with silica gel from (40-60  $\mu\text{m}$ ) from Acros.

The materials used in the PV study were obtained from commercial suppliers in high purity and used without further purification: glass/FTO (Nippon Sheet Glass), methylammonium iodide (MAI, DYESOL), PbI<sub>2</sub> (99.99%, TCI chemicals), CsI (abcr GMBH) PbBr<sub>2</sub> (99.99%, TCI chemicals), formamidinium iodide (FAI, DYESOL) *spiro*-OMeTAD (Solarpur), lithium bis(trifluoromethane) sulfonimide (LiTFSI, 99.9%, Sigma-Aldrich), tert-butylpyridine (96%, Sigma-Aldrich), tris(2-(1*H*-pyrazol-1-yl)-4-*tert*-butylpyridine)cobalt(III) tri[bis(trifluoromethane)sulfonimide] (FK 209, Dyenamo), DMSO (extra dry, Acros Organics), acetone (technical grade, Scharlab), chlorobenzene (extra dry, Acros Organics) and acetonitrile (extra dry, Acros Organics), DMF (extra dry, Acros Organics), ethanol (extra dry, Acros Organics)

### **Characterization and testing of the cells**

The solar cells were measured using a 450 W xenon light source (Oriel). The spectral mismatch between AM1.5G and the simulated illumination was reduced by the use of a Schott K113 Tempax filter (Präzisions Glas & Optik GmbH). The light intensity was calibrated with a Si photodiode equipped with an IR-cutoff filter (KG3, Schott) and it was recorded during each measurement. Current-voltage characteristics of the cells were obtained by applying an external voltage bias while measuring the current response with a digital source meter (Keithley 2400). The voltage scan rate was  $10 \text{ mV s}^{-1}$  and no device preconditioning was applied before starting the measurement, such as light soaking or forward voltage bias applied for long time. The starting voltage was determined as the potential at which the cells produce 1 mA in forward bias, no equilibration time was used. The cells were masked with a black metal mask ( $0.16 \text{ cm}^2$ ) to estimate the active area and reduce the influence of the scattered light. A Varian Cary5 spectrophotometer is used to measure UV–Vis absorption spectra of samples. IPCE spectra were measured under constant white light bias with an intensity of  $10 \text{ mW cm}^{-2}$  through a Gemini-180 double monochromator.

## 2. Synthetic procedures

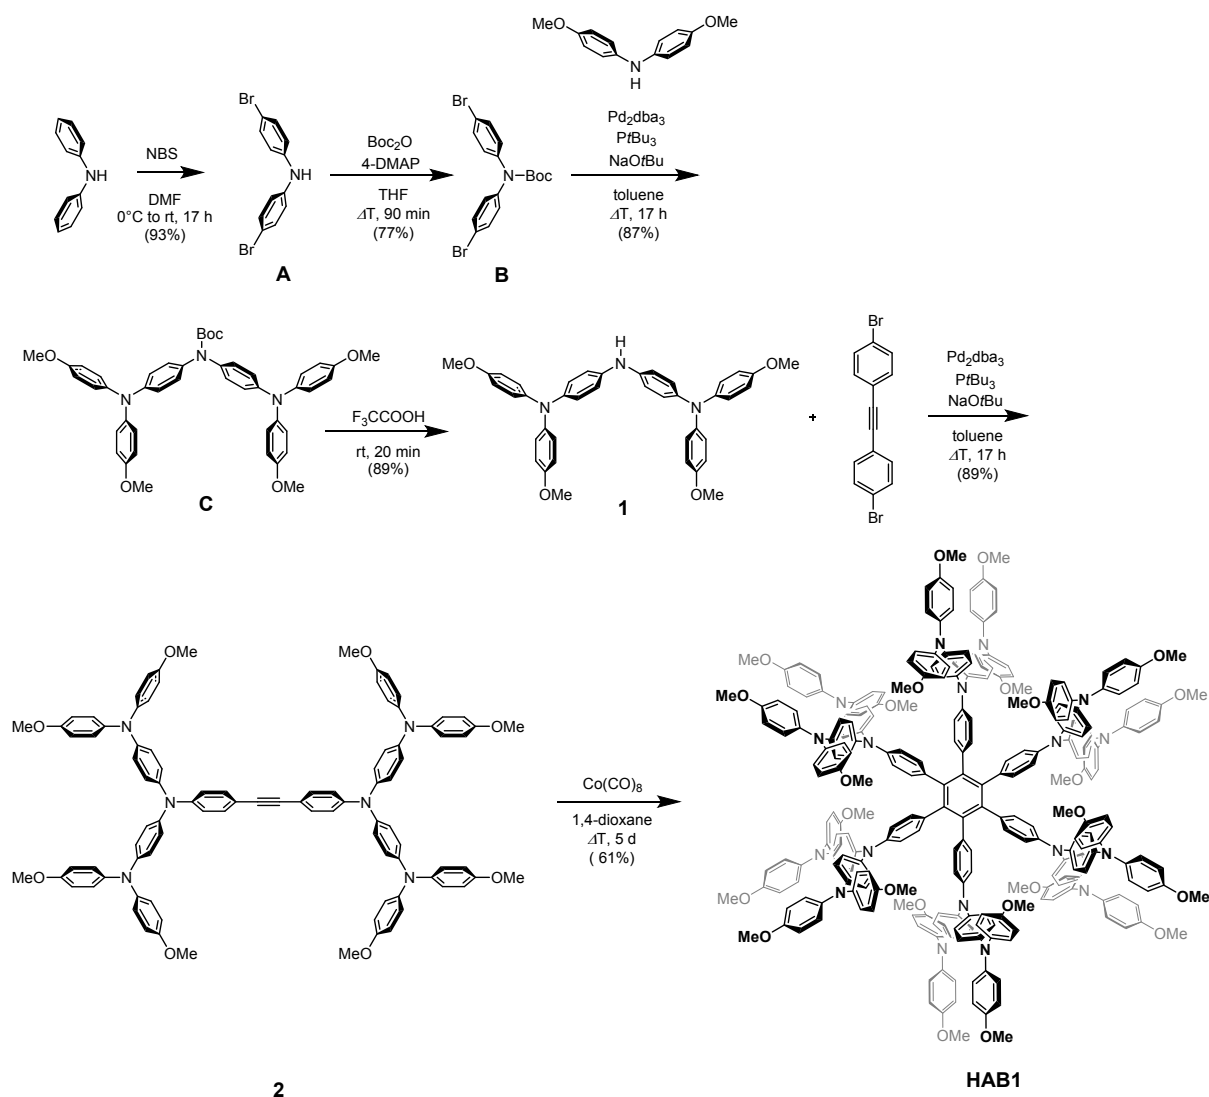

**Scheme S1.** Synthesis of hexa(oligotriarylamine)benzene **HAB1**.

Compounds **A**, **B**, **C** and **1** were synthesized according to literature procedure.<sup>[4]</sup>

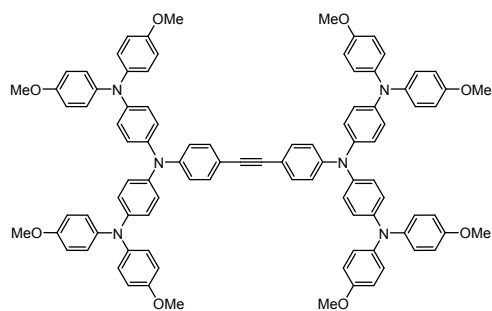

Synthesis of **2**. Compound **1** (600 mg, 962  $\mu\text{mol}$ ), 1,2-bis(4-bromophenyl)ethyne (154 mg, 458  $\mu\text{mol}$ ), and NaOtBu were dissolved in dry toluene (10 ml) under N<sub>2</sub> atmosphere and the solution was degassed for 10 min in a stream of N<sub>2</sub>. Pd<sub>2</sub>dba<sub>3</sub> (16.8 mg, 18  $\mu\text{mol}$ ) and PtBu<sub>3</sub> (1M in toluene, 18  $\mu\text{l}$ , 18  $\mu\text{mol}$ ) were added and the mixture was refluxed for 17 h. The solvent was removed under reduced pressure and the residue was purified by column chromatography (eluent: DCM; NEt<sub>3</sub> (0.5 v/v)) to give

the product as orange powder (581 mg, 409  $\mu\text{mol}$ , 89%).  **$^1\text{H-NMR}$**  (300 MHz,  $\text{C}_6\text{D}_6$ ):  $\delta$  [ppm] = 7.51–7.43 (AA', 4 H), 7.14–6.97 (36 H), 6.77–6.65 (AA', 16 H), 3.30 (s, 24 H).  **$^{13}\text{C-NMR}$**  (75 MHz,  $\text{C}_6\text{D}_6$ ):  $\delta$  [ppm] = 156.4 (quart), 148.6 (quart), 145.5 (quart), 141.7 (quart), 140.9 (quart), 132.9 (tert), 126.8 (tert), 126.7 (tert), 122.6 (tert), 120.8 (tert), 116.1 (quart), 115.2 (tert), 89.8 (quart), 55.1 (prim). **MALDI-TOF**: **MALDI-TOF pos** ( $[\text{M}^+]$ ): calc.: 1420.6037 m/z; found.: 1420.6044 m/z.

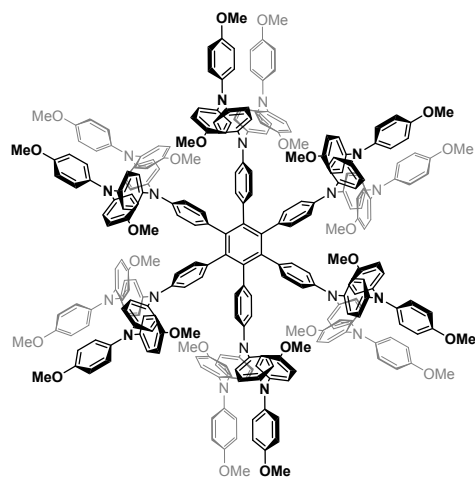

Synthesis of **HABI. 2** (500 mg, 352  $\mu\text{mol}$ ) was dissolved in dry 1,4-dioxane (10 ml) and the solution was degassed in a stream of  $\text{N}_2$  for 10 min.  $\text{Co}(\text{CO})_8$  (18.0 mg, 53  $\mu\text{mol}$ ) was added and the mixture was refluxed for 5 d. The solvent was removed under reduced pressure and the residue purified by flash chromatography (eluent:  $\text{DCM}/\text{MeOH}$  200:1  $\rightarrow$  70:1;  $\text{NEt}_3$  (0.5 v/v) was used for the packing of the column). The product was further purified by precipitation from  $\text{DCM}$  to pentane to obtain it as yellow powder (307 mg, 72  $\mu\text{mol}$ , 61%).  **$^1\text{H-NMR}$**  (300 MHz,  $\text{C}_6\text{D}_6$ ):  $\delta$  [ppm] = 7.12–7.03 (AA', 48 H), 7.03–6.83 (72 H), 6.74–6.63 (BB', 48 H), 3.30 (s, 72 H,  $\text{OCH}_3$ ).  **$^{13}\text{C-NMR}$**  (150 MHz,  $\text{C}_6\text{D}_6$ ):  $\delta$  [ppm] = 156.1 (quart), 146.2 (quart), 144.4 (quart), 142.1 (quart), 142.0 (quart), 140.7 (quart), 135.2 (tert), 133.1 (quart), 126.4 (tert), 125.9 (tert), 123.1 (tert), 121.5 (tert), 115.1 (tert), 55.1 (prim). **MALDI-TOF pos** ( $[\text{M}^+]$ ): calc.: 4261.8112 m/z; found.: 4261.8148 m/z.

- [1] N. G. Connelly and W. E. Geiger, *Chem. Rev.*, **1996**, 96, 877-910.
- [2] V. V. Pavlishchuk and A. W. Addison, *Inorg. Chim. Acta*, **2000**, 298, 97-102.
- [3] D. Tsiplakides, D. Archonta and C. G. Vayenas, *Top. Catal.*, **2007**, 44, 469-479.
- [4] A. G. Bonn, M. Neuburger and O. S. Wenger, *Inorg. Chem.*, **2014**, 53, 11075-11085.

### 3. Supporting Characterization Figures

#### NMR spectra

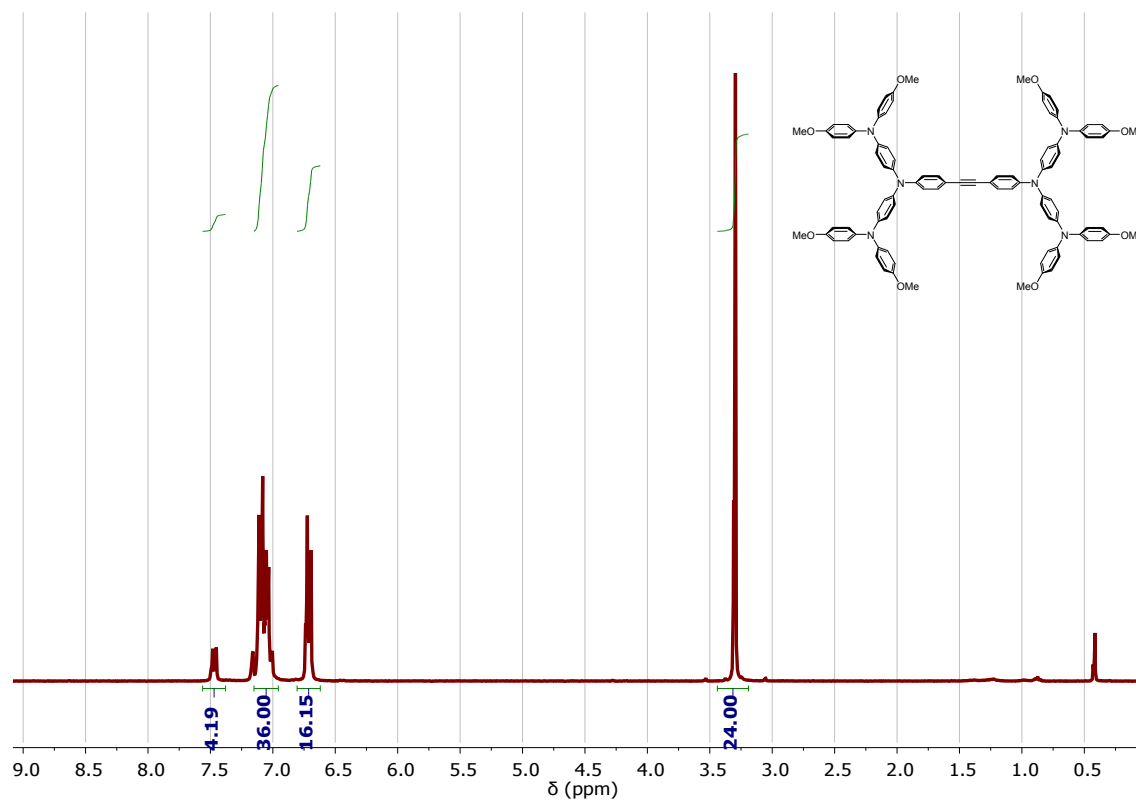

Figure S1. <sup>1</sup>H-NMR of **2** in C<sub>6</sub>D<sub>6</sub>.

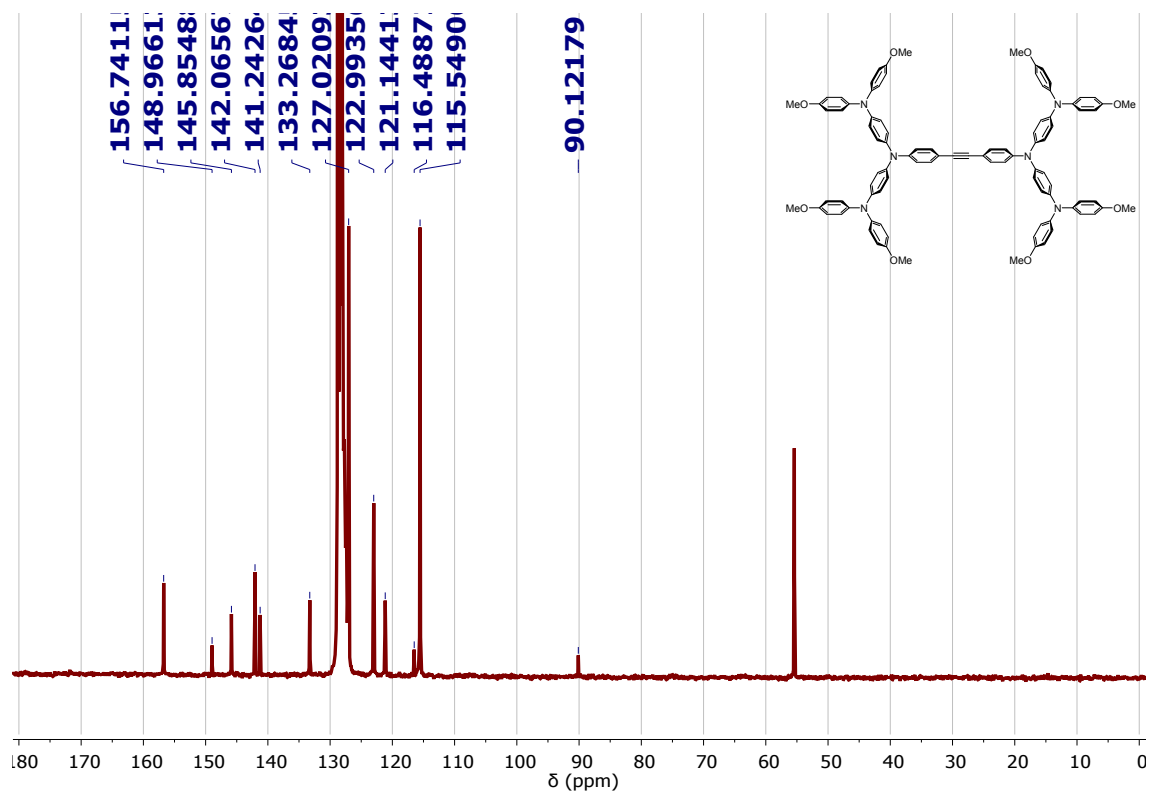

Figure S2. <sup>13</sup>C-NMR of **2** in C<sub>6</sub>D<sub>6</sub>.

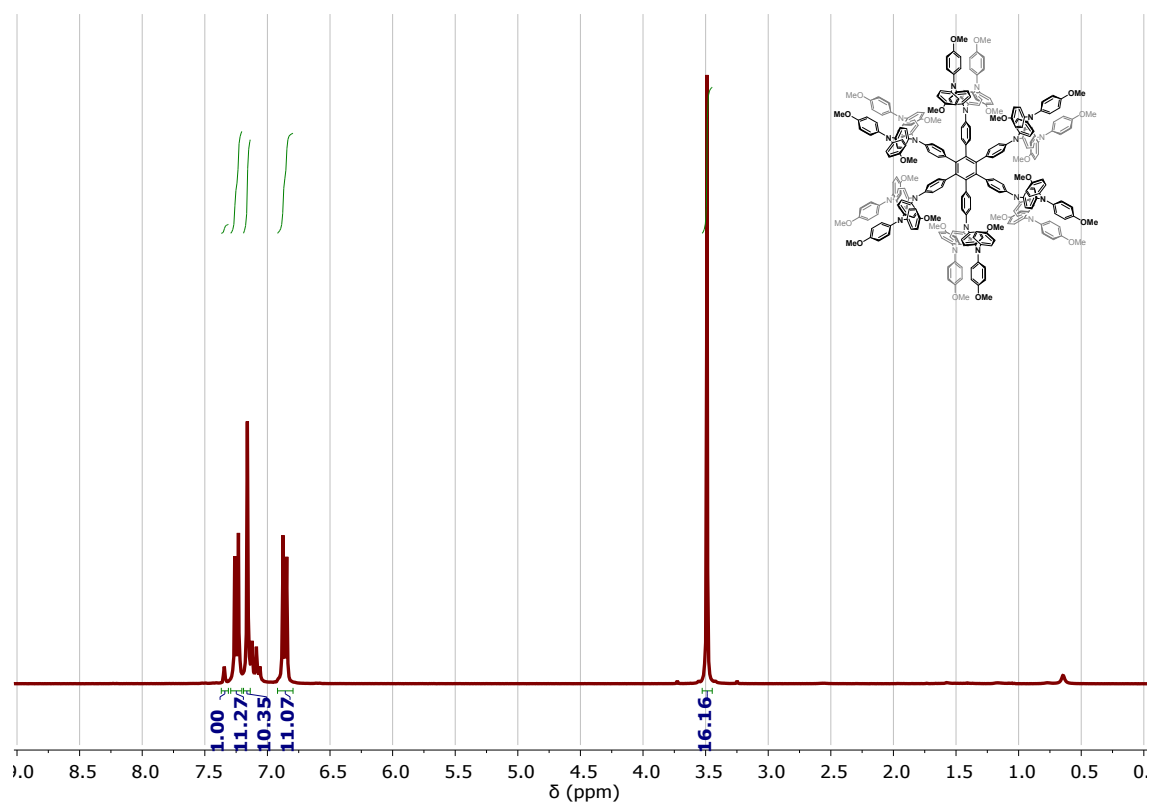

Figure S3. <sup>1</sup>H-NMR of **HAB1** in C<sub>6</sub>D<sub>6</sub>.

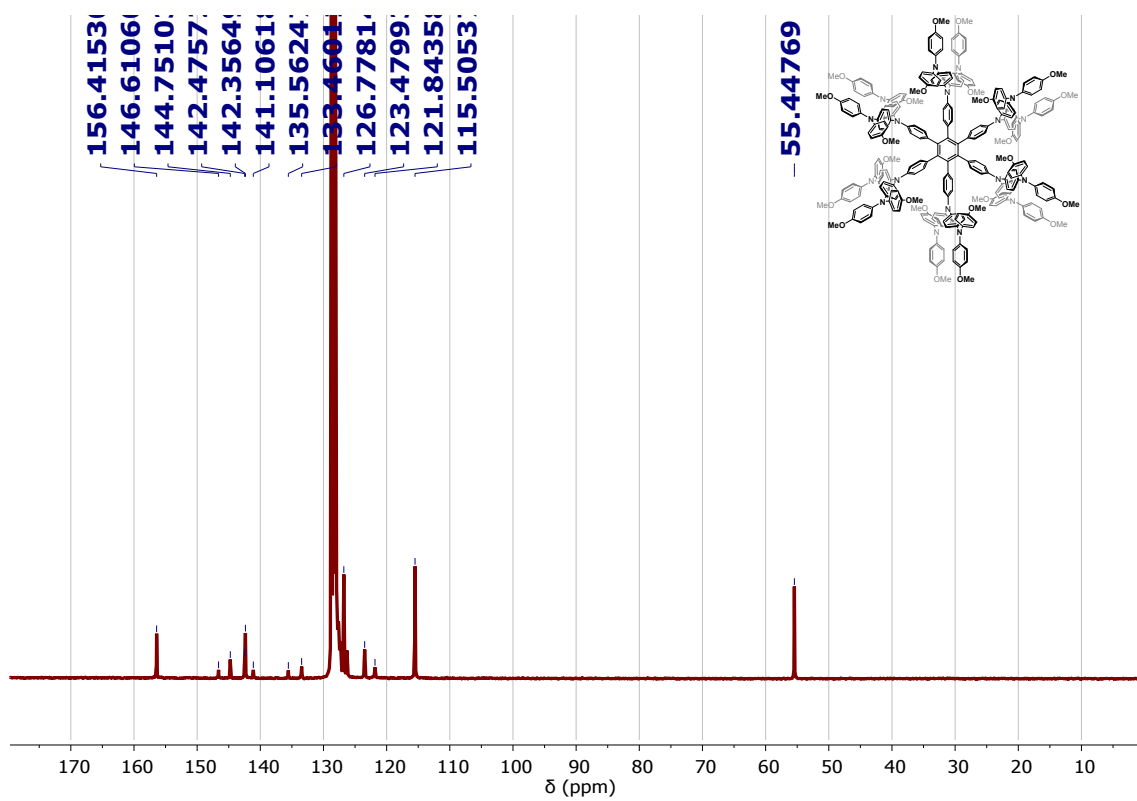

Figure S4. <sup>13</sup>C-NMR of **HAB1** in C<sub>6</sub>D<sub>6</sub>.

## UV-Vis Absorption

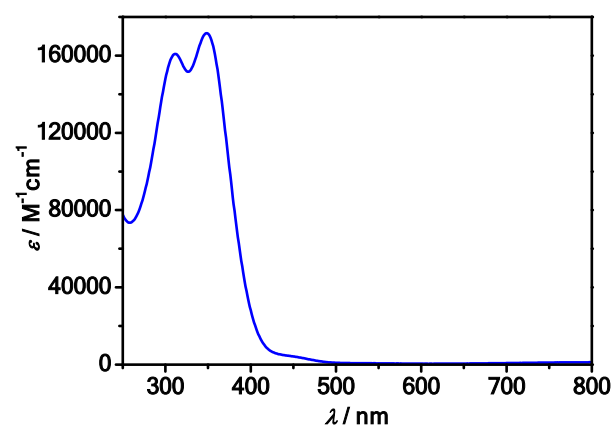

Figure S5. Absorption spectrum of **HAB1** in methylene chloride.

## Mass spectra

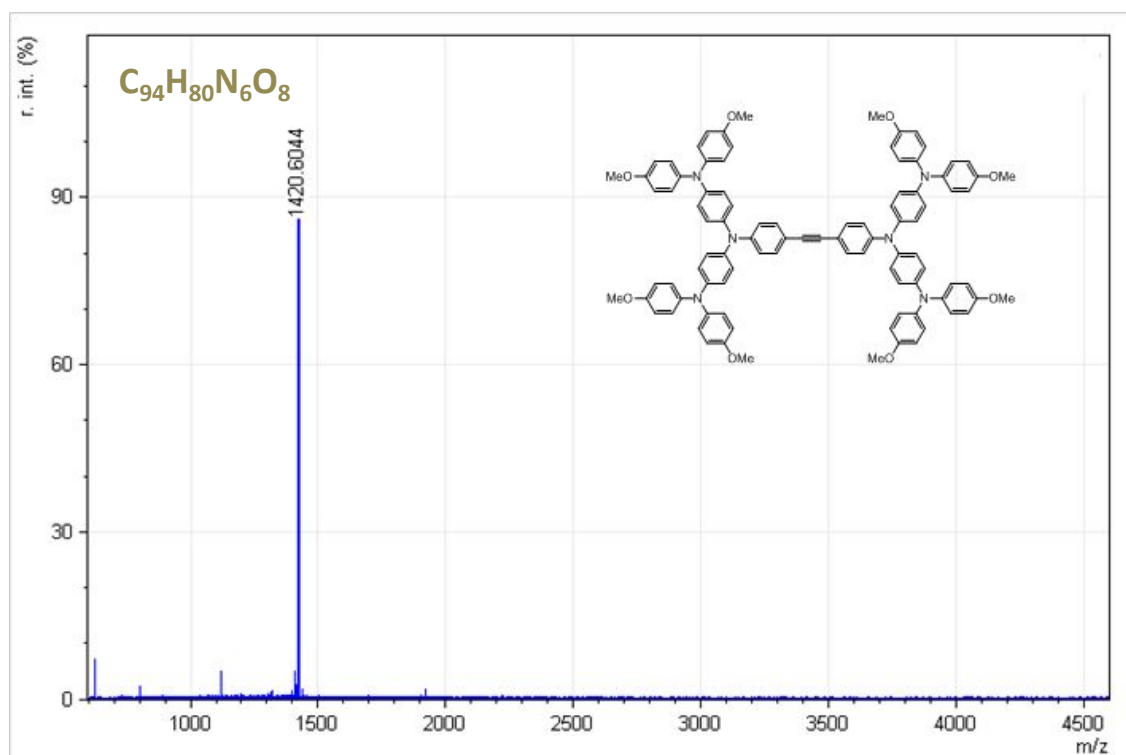

Figure S6. MALDI-TOF spectrum of **2**.

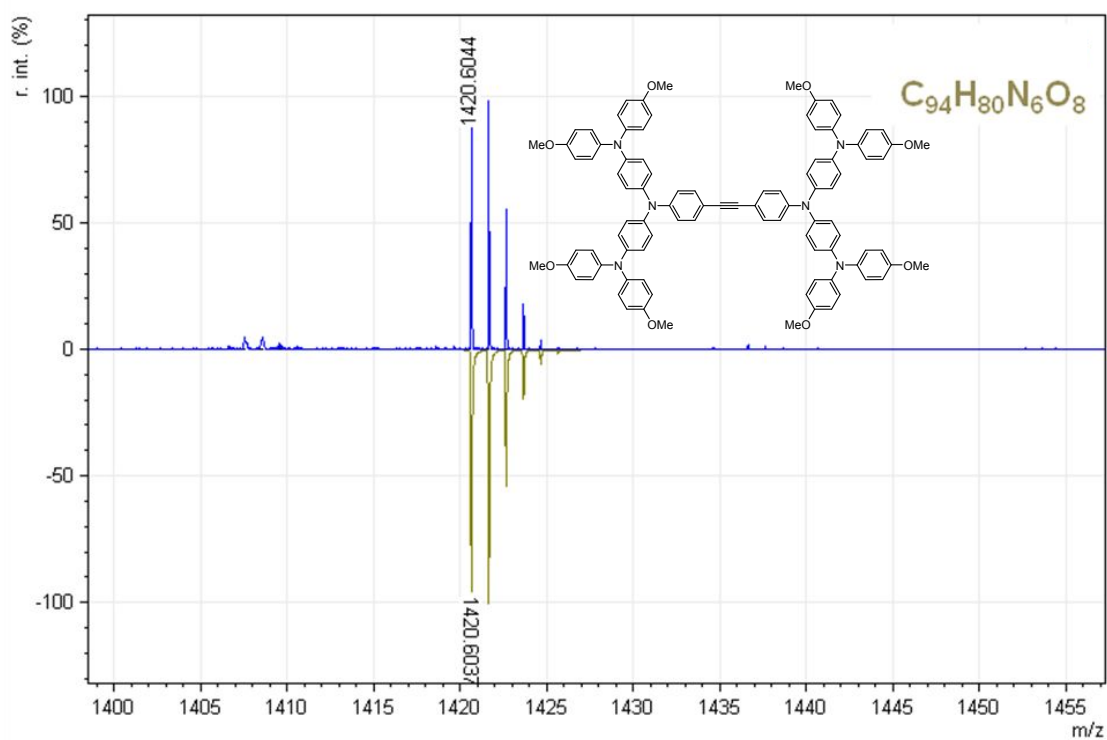

Figure S7. MALDI-TOF spectrum of **2**.

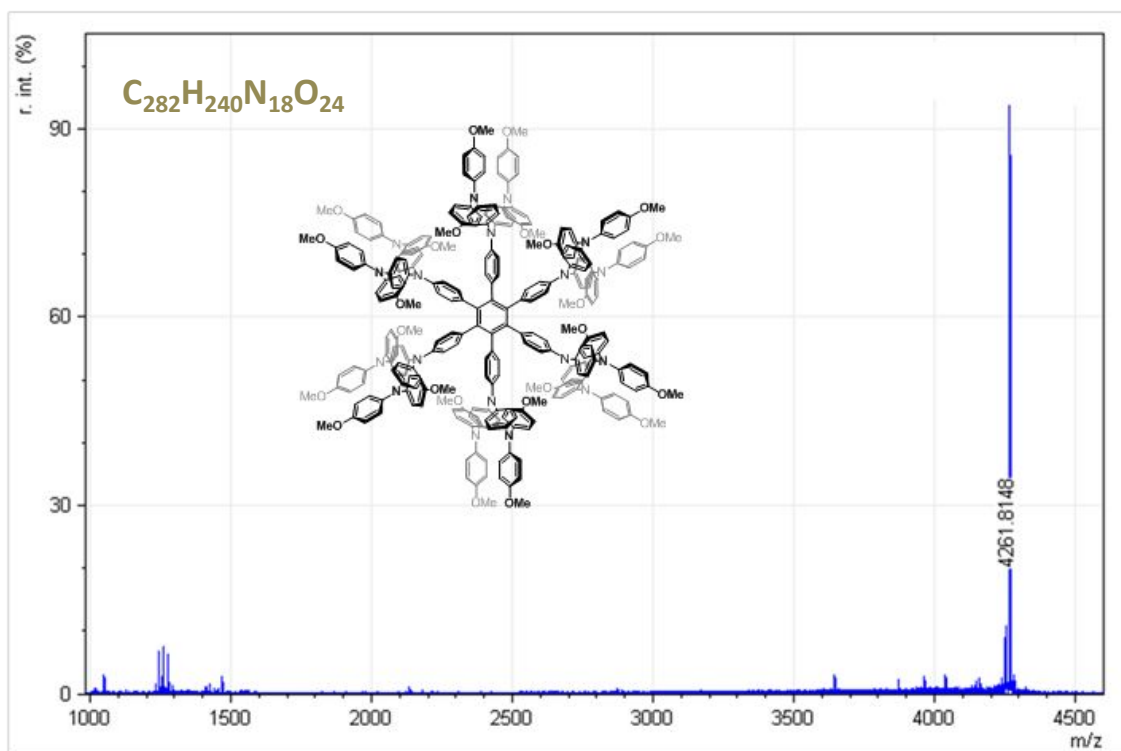

Figure S8. MALDI-TOF spectrum of **HAB1**.

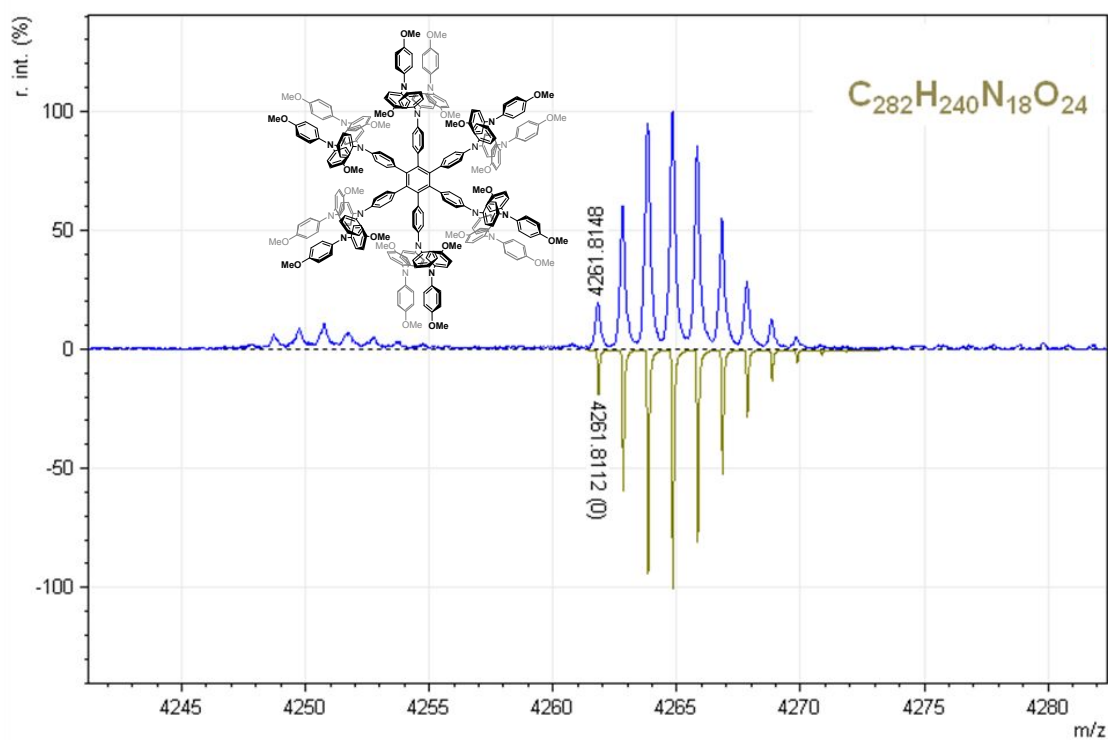

Figure S9. MALDI-TOF spectrum of **HAB1**.

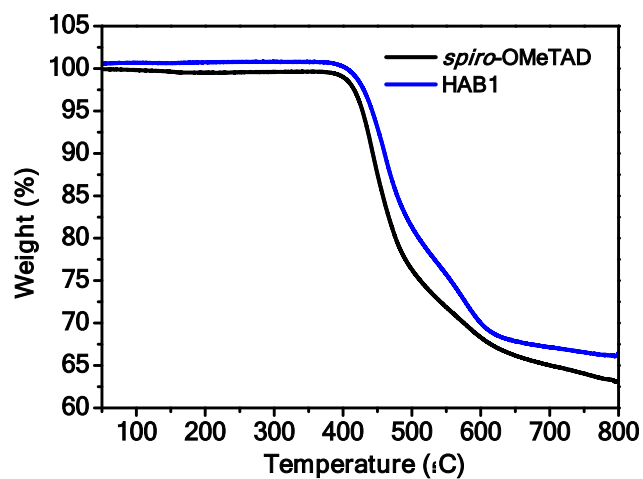

Figure S10. TGA of *spiro*-OMeTAD and **HAB1**

Table S1. Temperatures corresponding to 2% or 5% weight loss for both compounds.

| Sample               | T <sub>d</sub> (2% weight loss) (°C)* <sup>1</sup> | T <sub>d</sub> (5% weight loss) (°C)* <sup>2</sup> |
|----------------------|----------------------------------------------------|----------------------------------------------------|
| <i>spiro</i> -OMeTAD | 412.42                                             | 428.29                                             |
| <b>HAB1</b>          | 426.94                                             | 442.43                                             |

#### 4. Perovskite Solar Cells Preparation

##### Substrate preparation

FTO/Glass 10  $\Omega$ /sq was cleaned by sonication in 2% Hellmanex water solution for 15 min. After rinsing with deionised water, the substrates were further sonicated with ethanol for 15 min, and finally with acetone for the same amount of time. After a 15 min UV-ozone treatment, a 30 nm- $\text{TiO}_2$  compact layer was sprayed on FTO/Glass at 450 °C from a precursor solution of titanium diisopropoxide in anhydrous ethanol (0.2M), using  $\text{O}_2$  as a gas carrier. After spraying, the substrates were sintered at 450 °C for 30 min and left to cool down to room temperature. Then, mesoporous  $\text{TiO}_2$  layer was deposited by spin coating for 15 s at 5000 rpm, using 30 nm particle paste (Dyesol 30 NR-D) diluted in ethanol (weight ratio 1:6). After the spin coating, the substrates were sintered with a heating ramp up to 450°C, at which they were left for 30 min under dry air flow.

##### Perovskite precursor solution and film preparation

The perovskite precursor solution were prepared by dissolving MABr (Dyesol),FAI (Dyesol),  $\text{PbI}_2$  (TCI Chemicals), CsI (abcr GmbH) and  $\text{PbBr}_2$  (TCI Chemicals) in anhydrous DMF:DMSO (Acros Chemicals) 4:1 (v:v) to get a 1.35 M solution. The solution was kept at 70°C for 30 min before being spin coated through a two-step program at 2000 and 6000 rpm for 10 and 20 s respectively. During the second step, 200  $\mu\text{L}$  of chlorobenzene were poured on the spinning substrate 10 s prior to the end of the program. The substrates were then annealed at 100°C for 1 h in a dry box to form  $\text{Cs}_{0.5}(\text{MA}_{0.15}\text{FA}_{0.85})_{0.95} \text{Pb}(\text{I}_{0.85}\text{Br}_{0.15})_3$ .

##### Hole transporting layer and top electrode

After the perovskite annealing the substrates were cooled down for few minutes and *spiro*-OMeTAD (Solarpur, 74 mM in chlorobenzene) or **HAB1** (8.5 mM in chlorobenzene) were spun at 4000 rpm for 20 s. *Spiro*-OMeTAD was doped with Li-TFSI salt and TBP, with the molar ratios of 0.5 and 3.3 for Li-TFSI and TBP respectively. HAB1 was either doped the same way or with a further additive (FK209, with a molar ratio of 0.03 with respect to the HTM). Finally, 70-80 nm of gold top electrode were thermally evaporated under high vacuum.

## 5. PSCs Characterization

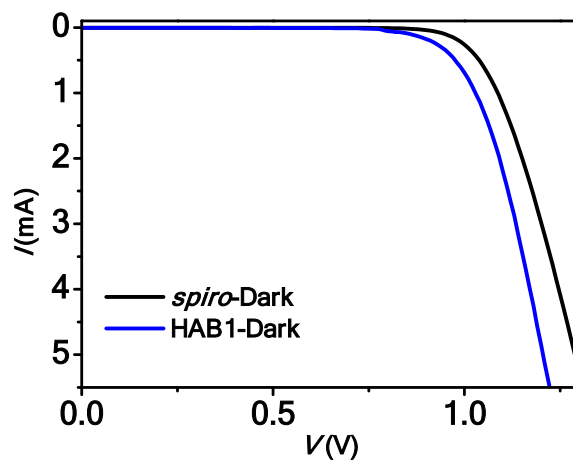

Figure S10: Dark curve of the best solar cells containing either *spiro*-OMeTAD or **HAB1**

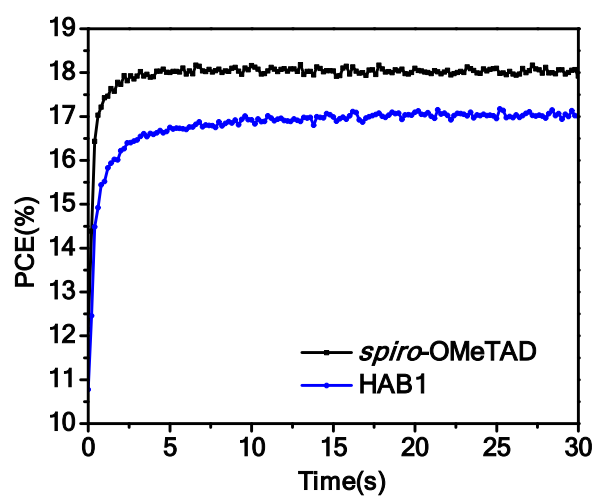

Figure S11. MPP tracking of the cells 10 days after the preparation.

| HTM                     |                            | Scan direction | $J_{sc}$ (mA cm <sup>-2</sup> ) | $V_{oc}$ (V) | FF (%) | PCE (%) | Hysteresis | MPPT  |
|-------------------------|----------------------------|----------------|---------------------------------|--------------|--------|---------|------------|-------|
| Right after preparation | spiro-OMETAD-TBP:Li        | Rev            | 23.34                           | 1.07         | 74.16  | 18.45   | 3.36       | 16.68 |
|                         |                            | For            | 23.32                           | 1.02         | 59.13  | 14.09   |            |       |
|                         | New-TBP <sub>3</sub> Li:Co | Rev            | 23.28                           | 1.04         | 72.45  | 17.48   | 3.38       | 15.45 |
|                         |                            | For            | 23.14                           | 0.988        | 57.25  | 13.1    |            |       |
| After 3 days            | spiro-OMETAD-TBP:Li        | Rev            | 23.16                           | 1.09         | 70.94  | 17.94   | 2.1        | 17.51 |
|                         |                            | For            | 23.45                           | 1.07         | 62.96  | 15.84   |            |       |
|                         | New-TBP <sub>3</sub> Li:Co | Rev            | 23.32                           | 1.06         | 68.56  | 16.92   | 2.67       | 16.24 |
|                         |                            | For            | 23.61                           | 1.03         | 58.63  | 14.25   |            |       |
| After 10 days           | spiro-OMETAD-TBP:Li        | Rev            | 23.15                           | 1.11         | 69.74  | 17.88   | 0.6        | 18.3  |
|                         |                            | For            | 23.44                           | 1.11         | 66.24  | 17.27   |            |       |
|                         | New-TBP <sub>3</sub> Li:Co | Rev            | 23.09                           | 1.08         | 68.11  | 16.91   | 1          | 17.21 |
|                         |                            | For            | 23.31                           | 1.08         | 63     | 15.98   |            |       |

Table S2: Photovoltaic parameters of the best devices for each HTM. Reverse and forward scan were registered after preparation, after 3 days and after 10 days.

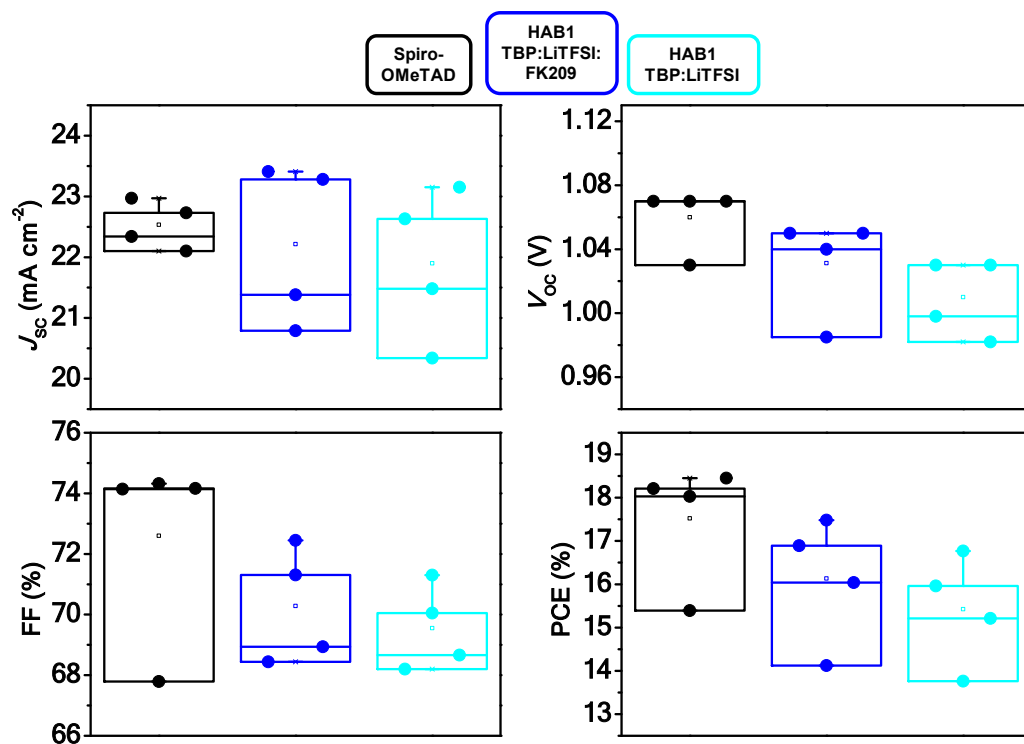

Figure S12: Statistics of the PV parameters of the reference and **HAB1**-containing cells.

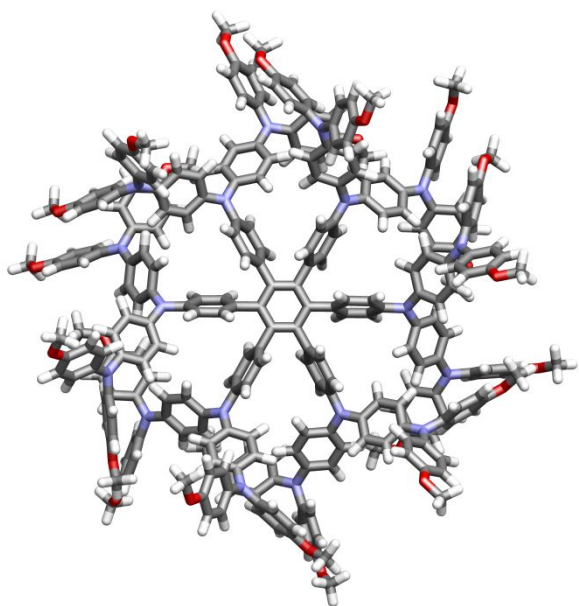

Figure S13. Top view of the optimized molecular structure of **HAB1** obtained by DFT calculations.
